# Supplementary material
Source: publisher figshare collection journal article supplement (https://acs.figshare.com/ndownloader/files/12794234)
Supplement: Supplementary file 1 [file 12794234]

## Supporting Information

### Site selectivity of hydride in early transition metal Ruddlesden-Popper oxyhydrides

*Olivier J. Hernandez<sup>1</sup>, Gregory Geneste<sup>2</sup>, Takeshi Yajima<sup>3,4</sup>, Yoji Kobayashi<sup>3</sup>, Masatoshi Okura<sup>3</sup>, Kouhei Aidzu<sup>3</sup>, Cédric Tassel<sup>3</sup>, Serge Paofai<sup>1</sup>, Diptikanta Swain<sup>1, 6</sup>, Clemens Ritter<sup>7</sup>, Hiroshi Kageyama<sup>3, 5\*</sup>*

<sup>1</sup> Univ Rennes, CNRS, ISCR (Institut des Sciences Chimiques de Rennes) - UMR 6226, F-35000 Rennes, France

<sup>2</sup> CEA, DAM, DIF, F-91297 Arpajon, France

<sup>3</sup> Department of Energy and Hydrocarbon Chemistry, Graduate School of Engineering, Kyoto University, Nishikyo-ku, Kyoto 615-8510, Japan

<sup>4</sup> Institute for Solid State Physics, The University of Tokyo, Kashiwa, Chiba 277-8581, Japan

<sup>5</sup> CREST, Japan Science and Technology Agency (JST), Kawaguchi, Saitama 332-0012, Japan

<sup>6</sup> Solid State and Structural Chemistry Unit, Indian Institute of Science, Bangalore-560012, India

<sup>7</sup> Institut Laue-Langevin, 71 avenue des Martyrs CS 20156, 38042 Grenoble Cedex 9, France

\* [kage@scl.kyoto-u.ac.jp](mailto:kage@scl.kyoto-u.ac.jp)

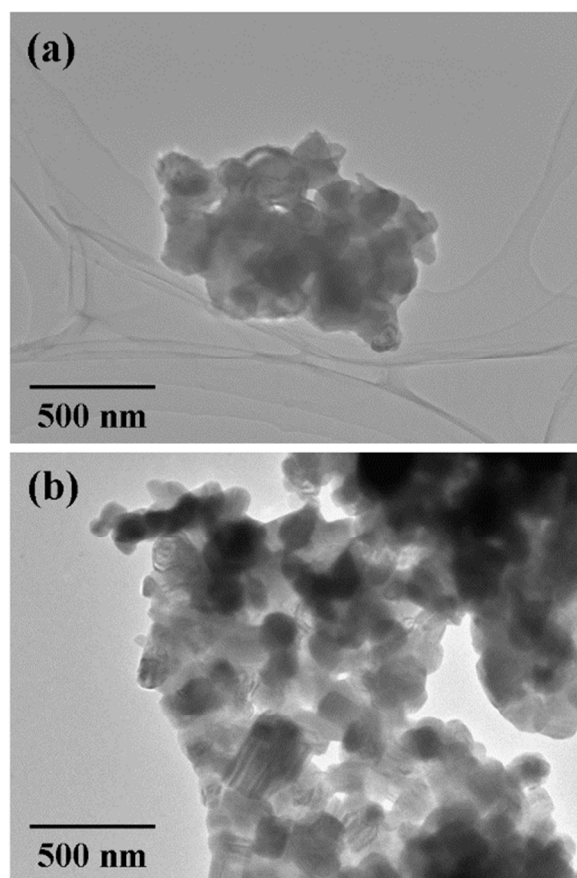

**Figure S1.** TEM images of (a)  $\text{Sr}_2\text{TiO}_4$  and (b)  $\text{Sr}_3\text{Ti}_2\text{O}_7$  precursors synthesized by the citrate method.

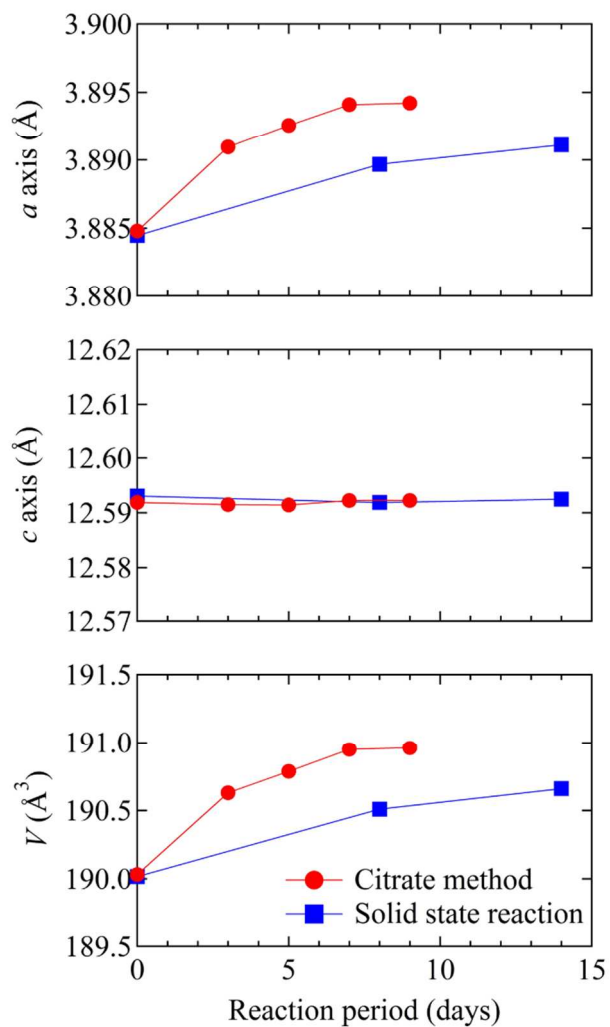

**Figure S2.**

Lattice parameters and cell volume (tetragonal symmetry) for starting material  $\text{Sr}_2\text{TiO}_4$  and its reduced samples. In the analysis, three phases of  $\text{Sr}_2\text{TiO}_{4-x}\text{H}_x$ ,  $\text{SrTiO}_{3-y}\text{H}_y$  and  $\text{TiH}_2$  are included. Both the starting materials synthesized by the citrate method and solid state reaction are shown here. The reduced samples are reacted with  $\text{CaH}_2$  at 480 °C for various reaction periods. The error bars are generally within the size of the markers on the plot.

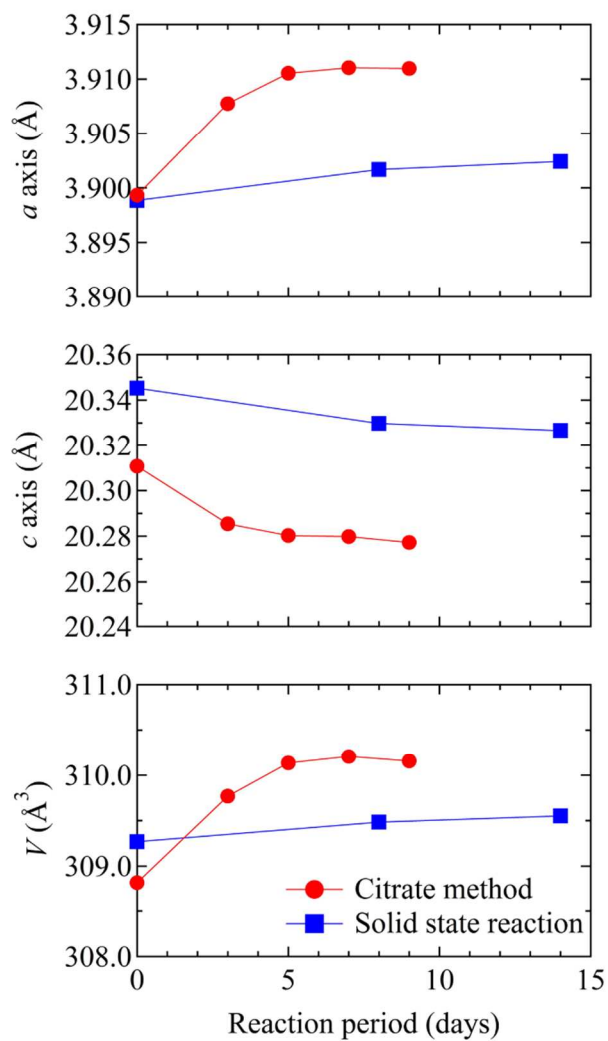

**Figure S3.** Lattice parameters and cell volume (tetragonal symmetry) for starting material  $\text{Sr}_3\text{Ti}_2\text{O}_7$  and its reduced samples. Both the starting materials synthesized by the citrate method and solid state reaction are shown here. The reduced samples reacted with  $\text{CaH}_2$  at 480 °C for various reaction periods. The error bars are generally within the size of the markers on the plot.

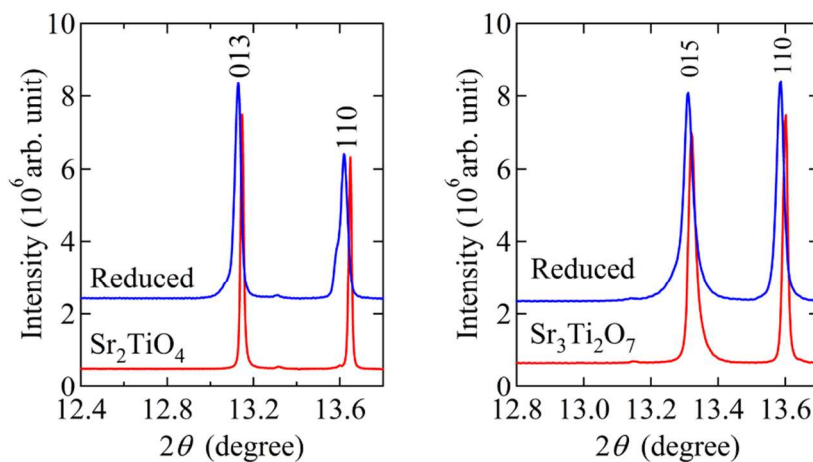

**Figure S4.** XRPD patterns for Sr<sub>2</sub>TiO<sub>4</sub> and its reduced sample (left); for Sr<sub>3</sub>Ti<sub>2</sub>O<sub>7</sub> and its reduced sample (right). The starting materials were synthesized by solid state reaction. The reduced samples were reacted with CaH<sub>2</sub> at 480°C for 4 days. For reduced Sr<sub>2</sub>TiO<sub>4</sub>, Bragg peaks exhibit an asymmetric shape due to the presence of a shoulder on the left side (see *e.g.*, the (1 1 0) reflection). For reduced Sr<sub>3</sub>Ti<sub>2</sub>O<sub>7</sub> such a profile anomaly is not visible, reflection being simply symmetrically broadened with regard to the precursor material.

# DFT calculations

## I – Hydride ion and oxygen vacancy in $\text{Sr}_2\text{TiO}_4$ and $\text{Sr}_3\text{Ti}_2\text{O}_7$

### I-1 Energies of the different sites

First, we provide the energies (in eV) of the two defects in their different possible sites, relative to the most stable one (apical in  $n = 1$ , bridging apical in  $n=2$ ).

$n = 1$  ( $\text{Sr}_2\text{TiO}_4$ )  $U = 3$  eV  $J = 0$  eV

| H/vacancy position | Hydride                | O vacancy              |
|--------------------|------------------------|------------------------|
| Apical             | 0.00 (GGA+ $U$ : 0.00) | 0.00 (GGA+ $U$ : 0.00) |
| Equatorial         | 0.24 (GGA+ $U$ : 0.17) | 0.12 (GGA+ $U$ : 0.20) |

The  $n = 1$  system with the hydrides in the two positions has been computed also with other values of ( $U$ ,  $J$ ), giving very similar results:

$U = 3$  eV (4 eV),  $J = 1$  eV

| H position | Hydride     |
|------------|-------------|
| Apical     | 0.00 (0.00) |
| Equatorial | 0.28 (0.27) |

$n = 2$  ( $\text{Sr}_3\text{Ti}_2\text{O}_7$ )

| H/vacancy position | Hydride | O vacancy |
|--------------------|---------|-----------|
| Apical             | 0.17    | 0.32      |
| Bridging apical    | 0.00    | 0.00      |
| Equatorial         | 0.28    | 0.40      |

### I-2 Electronic structure

We focus on the electronic structure of the most stable defective systems. While the perfect systems are found insulators (Fig. 8 of the main text), the hydrided and oxygen-deficient systems are found metallic, with states at the bottom of the conduction band occupied, consistently with

the fact that the two defects considered (hydrides, O vacancy) are single and double donors (Fig. 8). In the present calculations, the electron(s) released by the defects do not localize on a single Ti atom (under the form of a small polaron  $\text{Ti}^{3+}$ ) but remain delocalized over several Ti atoms in the supercell, and the newly occupied state(s) mainly appear(s) as linear combination(s) of  $3d$  Ti orbitals.

Several electronic states with very close total energies may be found. For instance, in the bridging apical site of the O vacancy, we find a slightly magnetic state (with very small magnetic moments  $\sim 0.04 \mu_B$  on half of the Ti atoms, and  $< 0.001$  on the others), or a non-magnetic state with a magnetic moment  $< 0.002 \mu_B$  on all the Ti. These two electronic configurations have, however, total energies that only differ by less than 1 meV. The same degeneracy has been observed for the hydride ion at this same site between two states, the one with half the Ti having magnetic moments  $\sim 0.06 \mu_B$  with the same sign (the other close to zero, i.e.  $< 0.0001 \mu_B$ ), the other with half the Ti having moment  $\sim 0.06 \mu_B$  with alternating signs, so that the supercell has no net magnetic moment. Both have however energies identical within 1 meV. Thus, several electronic configurations are observed in some cases, but this degree of freedom does not change significantly the energy of the configuration.

### I-3 Optimized lattice constants

$n = 1$

| Model                        | $a$ (Å) | $c$ (Å) |
|------------------------------|---------|---------|
| Perfect systems              | 3.856   | 12.392  |
| Defective systems: Hydride   | 3.864   | 12.376  |
| Defective systems: O vacancy | 3.867   | 12.385  |

$n = 2$

| Model                        | $a$ (Å) | $c$ (Å) |
|------------------------------|---------|---------|
| Perfect systems              | 3.871   | 20.088  |
| Defective systems: Hydride   | 3.875   | 20.063  |
| Defective systems: O vacancy | 3.878   | 20.060  |

(for comparison: pure  $\text{SrTiO}_3$  computed with the same numerical scheme in a cubic  $Pm\bar{3}m$  cell: LDA :  $a = b = c = 3.863$  Å, LDA+ $U$ :  $a = b = c = 3.879$  Å).

### I-4 Atomic distortions

$n = 1$ : The hydride increases significantly its distance with respect to its neighboring Ti compared to the O atom in the perfect system:

perfect O-Ti along  $z$ : 1.979 Å

H-Ti (apical site): 2.162 Å

$n = 2$ : in the bridging-apical configuration for both defects, the two neighboring Ti atoms are significantly pushed away by the defect, which can be quantified by the distance between these two Ti:

$n = 2$  (perfect): 3.935 Å

$n = 2$  H bridging-apical: 4.123 Å

$n = 2$  O vacancy bridging-apical: 4.327 Å

### I-5 Charged supercells

In the  $n=2$  compound, we have recomputed the H impurity in charge state +1, and the O vacancy in charge states +1 and +2. Here the lattice constants are fixed to those of the perfect system and not relaxed. We obtain the same order as for the neutral defects:

|                 | Hydride $q = +1$ | O vacancy $q = +2$ | O vacancy $q = +1$ |
|-----------------|------------------|--------------------|--------------------|
| Apical          | 0.17             | 0.53               | 0.50               |
| Bridging apical | 0.00             | 0.00               | 0.00               |
| Equatorial      | 0.32             | 0.74               | 0.62               |

## II – Strontium vanadate $\text{Sr}_2\text{VO}_4$ with hydride impurities

### II-1 Perfect system

As indicated in the main text, the present LDA+ $U$  calculations do not pretend to capture all the complexity of the electronic structure of this strongly-correlated electron compound. We expect, however, a correct description of charge localization and bonding. We have used  $U = 5$  eV and  $J = 0$  eV on the  $d$  states of vanadium, but tests have been performed using  $U = 3.5$  eV and  $J = 0$  eV, and using  $U = 5$  eV and  $J = 0.7$  eV.

In  $\text{Sr}_2\text{VO}_4$ , the V ions are in the +4 charge state (electronic structure  $3d^1$ ). By contrast with the titanate compounds previously presented,  $\text{Sr}_2\text{VO}_4$  is a Mott insulator: the occupied  $3d$  states are stabilized by strong electronic correlations, and energetically located at the top of the valence



band, just above the  $2p$  states of oxygen. The bandgap therefore separates the occupied  $3d$  states of V from the unoccupied  $3d$  states of this atom. The compound is assumed as antiferromagnetic, with the sign of the magnetic moments alternating along the  $x$  and  $y$  Cartesian directions.

## II-2 Hydrides

One H atom is introduced in the 56-atom supercell, replacing either an apical or an equatorial oxygen (it corresponds to a system with chemical formula  $\text{Sr}_2\text{VO}_{3.875}\text{H}_{0.125}$ ). After structural optimization, we observe that the electron released by the  $\text{H}^\cdot$  defect is localized on a V atom next to the H (formally it is a  $\text{V}^{3+}$ ). This is clearly visible on the atomic magnetic moments: the magnetic moment of the reduced V evolves from 0.9 to 1.7  $\mu_B$ , while all the other V atoms retain a magnetic moment of 0.9  $\mu_B$ . This behavior is the same whether  $U = 3.5$  eV or  $U = 5$  eV.

Second, in contrast to the titanate compounds,  $\text{H}^\cdot$  is found as more stable in the equatorial site than on the apical one. The energies of the different configurations (relative to the most stable) are:

| $(U, J)$ (eV) | $U = 5, J = 0$ | $U = 3.5, J = 0$ | $U = 5, J = 0.7$ |
|---------------|----------------|------------------|------------------|
| Apical        | 0.14           | 0.18             | 0.15             |
| Equatorial    | 0.00           | 0.00             | 0.00             |
